# Supplementary material for: Economic impact of TAVI pathway optimisation: the experience of the University Hospital of Parma.
Source: Research Square preprint supplement (doi:10.21203/rs.3.rs-4741137/v1), 2024-08-13
Supplement: Supplementary file 1 [file 721734b61fbb86033889bd7a.docx]

**Check-list to stratify the coronary risk**

***name and surname of the patient***

***Coronary risk stratification pre-TAVI***

**Cardio CT candidate**

*If he/she meets all the following criteria:*

|  |  | **YES** | **NO** |
| --- | --- | --- | --- |
| # | Asymptomatic for angina or assena objective documentation of ischaemia | **□** | **□** |
| # | Negative medical history for CAD | **□** | **□** |
| # | FE > 35% | **□** | **□** |
| # | Cardiovascular risk factors (3+) | **□** | **□** |
| # | Absence of severe chronic renal insufficiency (GFR>30 ml/min) | **□** | **□** |
| # | High FC atrial tachyarrhythmia | **□** | **□** |
| # | Not previous SVAo or TAVI | **□** | **□** |
