# Supplementary material for: Economic impact of TAVI pathway optimisation: the experience of the University Hospital of Parma.
Source: Research Square preprint supplement (doi:10.21203/rs.3.rs-4741137/v1), 2024-08-13
Supplement: Supplementary file 2 [file 7b09afca8a1db361fe882828.docx]

**Checklist to evaluate patients eligible for a fast track to discharge**

**Clinical-anamnestic criteria (by the clinical cardiologist)**

|  |  | **YES** | **NO** |
| --- | --- | --- | --- |
| # | Severe obesity (BMI<35) | **□** | **□** |
| # | Severe left ventricular dysfunction (FE<30%) | **□** | **□** |
| # | ECG: BBDx or BAV pre-existing | **□** | **□** |
| # | Severe CRI (= or > grade III) | **□** | **□** |
| # | Inability to maintain supine decupitus | **□** | **□** |
| # | Impaired mobility/functional capacity* or prolonged breastfeeding status  (* geriatric score to be defined) | **□** | **□** |
| # | Lack of adequate social and family support | **□** | **□** |
| # | Consent has been signed by patient and caregiver? | **□** | **□** |

**Clinical-technical criteria (by the Heart Team)**

|  |  | **YES** | **NO** |
| --- | --- | --- | --- |
| # | Candidate for general anaesthesia +/- TEE | **□** | **□** |
| # | Cut-down femoral | **□** | **□** |
| # | High risk of post procedural conduction disorders | **□** | **□** |
| # | Candidate for TAVI non - TF | **□** | **□** |
