# Supplementary material for: Economic impact of TAVI pathway optimisation: the experience of the University Hospital of Parma.
Source: Research Square preprint supplement (doi:10.21203/rs.3.rs-4741137/v1), 2024-08-13
Supplement: Supplementary file 3 [file b94b543aceb21e398fd0c7f0.docx]

| **Proposing Operational Unit:** | **Type of assignment:** |
| --- | --- |
| Heart Team | Organisational Function Assignment |

**Job title:** Clinical Valve Coordinator

**Mission:**

Despite recent therapeutic innovations, patients with severe aortic stenosis (sAS) continue to be underdiagnosed and treated late. sAS is a time-dependent disease and after the onset of the first symptoms, the average survival is less than 2-3 years without appropriate intervention. However, thanks to the more recent spread of clinical indications for TAVI (transcatheter aortic valve implantation) and the improvement of the technology itself with smaller delivery systems as well as better performing heart valves, excellent clinical results are obtained even in complex cases with significant valve calcifications, difficult vascular access and multiple comorbidities. Recent studies have shown equivalent or even better results with TAVI procedure than with surgical aortic valve replacement in patients with intermediate or low operative risk, but these recent developments have gone largely unnoticed by family doctors or cardiologists working outside the hospital network or in hospitals where TAVI procedure is not performed.

The role of the Clinical Valve Coordinator is therefore critical in order to optimise the pre-hospital pathway of patients, ensuring efficiency in the diagnostic and assessment phases by facilitating multidisciplinary consultations, diagnostic imaging, nursing assessment and communication and coordination within the heart team, supporting timely and appropriate access to treatment.

In terms of key roles and responsibilities of the Clinical Valve Coordinator, four main areas should be highlighted: i) clinical care; ii) coordination; iii) education and iv) program leadership. Each area is briefly described below:

***Clinical care***

- Pre procedural optimization including clinical assessment, completion of necessary preprocedural tests, patient and family education about the procedure and risks, identification of clinical changes which may impact on the planned procedure.
- Urgency triage, mitigation of risks
- Procedure planning and communication with heart team
- Case and complication management
- Mobilization and promotion of reconditioning post-procedure

***Coordination***:

- Patient tracking (e.g. diagnostics, investigations).
- Communication with clinicians, patients, relatives.
- Contact with referring physicians and hospitals.
- Pre-procedure coordination (clinical changes, awareness).
- Post-procedure planning, follow-up.
- Contact with primary care physicians regarding follow-up.

***Patient and family education***, from admission to discharge planning.

- Consent (risks, alternatives, impact on life post-procedure)
- Discharge preparation, point of contact after discharge

***Program leadership***

- Managing change and quality improvement.
- Defining protocols and pathways of care, and keep them updated
- Single point of contact
- Nursing education/mentoring.
- Troubleshooting operational issues
- Outreach with referring doctors and hospitals on how to improve the TAVI program.

All these elements will allow an informed therapeutic decision by the Heart Team, the multidisciplinary group in which all indications for TAVI are discussed. The Clinical Valve Coordinator himself/herself is an active member of the Heart Team.

It is important to underline that the decision of the therapy taken by the Heart Team should consider the preference of the informed patient. Patients should be supported by the Clinical Valve Coordinator and receive education about the procedure, recovery, hospitalization time, associated risks, alternative treatement, etc., ideally they should be provided dedicated supporting material to facilitate their understanding. Structured and tailored co-ordination in the pre and post-TAVI phases can improve the patient journey and optimise post-procedural follow-up.

Once the decision for TAVI has been made, the Clinical Valve Coordinator will act as a point of contact promoting streamlined processes which includes reduction of pre-hospital waiting time, local anaesthesia, reduction of unnecessary procedure materials, early mobilisation, reduced hospital stay.

Finally, the Clinical Valve Coordinator will be responsible for data collection during hospitalisation and during the follow-up visit of patients coming directly to the TAVI centre, neighbouring facilities and spoke hospitals.

**Human and Instrumental Resources:**

The Clinical Valve Coordinator is responsible for coordinating all the professionals involved in the TAVI pathway. Furthermore it is responsible for evaluating the technology used in the process.

# Organizational and functional relationships:

| **Interlocutor**: | **Interaction**: |
| --- | --- |
| Patients and family | **Functional relationship:** coordinates the pre-hospital pathway, gathering the information needed by the Heart Team to make decisions about the patient and the procedure to be performed, the pre-procedural pathway and the post-procedural pathway (clinical assessment with completion of necessary preprocedural tests).  He/she is point of reference for patient and family education. |
| General practitioner, other specialists and out-of-hospital cardiologists | Functional relation: informs them of the possibility of carrying out the TAVI procedure in patients with sAS.  Contact person for patients also in the follow up (after discharge).  Clinical Valve Coordinator is the contact person (Single point of contact) for referring physicians/hospitals. |
| Clinical cardiologists practising in non-TAVI hospitals |
| Physicians and nurses attending TAVI patients | **Functional relation**: collects patient information through them. He/she is in connection and constant communication with all Heart team members for procedural planning and complication management.  Clinical Valve Coordinator has a role in nursing education/mentoring. He/she also promotes early mobilization and early discharge for suitable patients. |

# Objectives and responsibilities of the assignment

| Objectives and responsibilities: | Examples of measurable actions |
| --- | --- |
| Correct application of the TAVI procedure | N ... of patients to whom the procedure is correctly applied compared to eligible patients = > 90% |
| Management of information | Timely entry, verification and correct handling of clinical information.  Understands the need to collect data for clinical audit and reporting |
| Review and update procedure | Regular review of TAVI pathway protocols/flowchart/check-lists to ensure alignment with new guidelines/evidences |
| Training of colleagues | Organisation and delivery of educational sessions according to local needs.  Regular education and mentoring with provision for new joiners to support their integration into the team |
| Promoting, when appropriate, the “minimalist TAVI” model  Ensure the engagement and alignment with all the multidisciplinary involved stakeholders | % of patients treated with minimalist TAVI model among who are appropriate for a minimalist approach. |
| Optimisation of the pre- procedural pathway | Adherence to pre-procedural times and containment within the planned duration |
| Optimisation of post-procedural follow-up | Adherence to follow-up times and containment within the planned duration |
| Technology assesment | Management of equipment and tools through timely scheduling of orders |
| Quality of service | Continuous improvement of patient-perceived quality (customer satisfaction questionnaires).  An assessment about the patient understanding of the TAVI pathway to measure the quality of patient education. |
| Interface management with main stakeholders | Participation in meetings and integration with internal (physicians, nurses, etc.) and external stakeholders (spoke centers, rehabilitation facilities, etc.) |
